# Supplementary material for: Context Matters: How Experimental Language and Language Environment Affect Mental Representations in Multilingualism
Source: MDPI journal article supplement (doi:10.3390/languages9030106), 2024-03-19
Supplement: s1 [file s1]

# Supplemental Materials for Sperl, Tomé, Kühn & Kreysa: Context Matters. How Experimental Language and Language Environment affect Mental Representations in Multilingualism. *MDPI Languages*.

## S1. Experiment 1: Overview of participants' language skills

| Participant | L1             | L2                                 | L3      | Additional Languages      | Country of Residence | Language Count |
|-------------|----------------|------------------------------------|---------|---------------------------|----------------------|----------------|
| 1           | Portuguese     | English                            | German  | French, Greek             | Germany              | 5              |
| 2           | Kurdish        | German                             | English | Turkish, Arabic           | Germany              | 5              |
| 210         | French         | English                            | German  | -                         | Germany              | 3              |
| 415         | Chinese        | English                            | German  | -                         | Germany              | 3              |
| 604         | Spanish        | English                            | German  | Catalan                   | Germany              | 4              |
| 612         | Spanish        | German                             | English | Catalan, Russian          | Germany              | 5              |
| 806         | French         | Languages acquired at the same age |         | Danish                    | Germany              | 4              |
| 812         | Portuguese     | English                            | German  | Spanish                   | Germany              | 4              |
| 1000        | Serbo-Croatian | English                            | German  | Serbian, Russian, Italian | Germany              | 6              |
| 1066        | Spanish        | English                            | German  | -                         | Germany              | 3              |
| 1202        | Spanish        | English                            | German  | Italian                   | Germany              | 4              |
| 1215        | French         | German                             | English | -                         | Germany              | 3              |
| 1357        | Arabic         | English                            | German  | Spanish                   | Germany              | 4              |
| 1366        | Spanish        | English                            | German  | French                    | Germany              | 4              |
| 1403        | Spanish        | English                            | German  | Italian                   | Germany              | 4              |

|      |            |         |         |                                             |         |   |
|------|------------|---------|---------|---------------------------------------------|---------|---|
| 1407 | Portuguese | English | German  |                                             | Germany | 4 |
| 1503 | Portuguese | English | German  | Spanish, French                             | Germany | 5 |
| 1736 | Croatian   | English | German  | Italian                                     | Germany | 4 |
| 1802 | Georgian   | German  | English | Russian                                     | Germany | 4 |
| 1805 | Spanish    | English | German  | -                                           | Germany | 3 |
| 1896 | Serbian    | English | German  | Italian, Swedish                            | Germany | 5 |
| 1929 | Serbian    | German  | English | Macedonian, Bulgarian, Croatian, Chinese    | Germany | 7 |
| 1994 | Turkish    | English | German  | -                                           | Germany | 3 |
| 1998 | Armenian   | English | German  | Russian, Italian                            | Germany | 5 |
| 2007 | Swedish    | English | German  | Dutch, Italian, French                      | Germany | 6 |
| 2209 | Spanish    | English | German  | -                                           | Germany | 3 |
| 2211 | Serbian    | German  | English | French, Macedonian, Greek, Italian, Russian | Germany | 8 |
| 2369 | Bulgarian  | English | German  | -                                           | Germany | 3 |
| 2507 | Serbian    | English | German  | -                                           | Germany | 3 |
| 2606 | Spanish    | English | German  | -                                           | Germany | 3 |
| 2607 | Spanish    | English | German  | Italian, French, Dutch, Catalan             | Germany | 7 |
| 2615 | Norwegian  | English | German  | -                                           | Germany | 3 |
| 3101 | Spanish    | English | German  | -                                           | Germany | 3 |
| 4790 | Romanian   | English | German  | Russian, French, Spanish                    | Germany | 6 |
| 5050 | Serbian    | English | German  | -                                           | Germany | 3 |
| 5207 | Turkish    | German  | English | -                                           | Germany | 3 |
| 5416 | Spanish    | English | German  | -                                           | Germany | 3 |
| 5513 | Greek      | English | German  | -                                           | Germany | 3 |

|       |            |         |        |                                     |         |   |
|-------|------------|---------|--------|-------------------------------------|---------|---|
| 6464  | Italian    | English | German | Albanian, Russian, Spanish          | Germany | 6 |
| 8274  | Spanish    | English | German | Italian                             | Germany | 4 |
| 8791  | Portuguese | English | German | -                                   | Germany | 3 |
| 9266  | Spanish    | English | German | -                                   | Germany | 3 |
| 9876  | Spanish    | English | German | Basque, French                      | Germany | 5 |
| 15673 | Spanish    | English | German | Italian                             | Germany | 4 |
| 16116 | Spanish    | English | German | French, Italian, Portuguese, Arabic | Germany | 7 |

---

*Note:* While English and German appear here as L2 and L3 (or vice versa) for all participants in the sequentially correct order of acquisition, we did not ask AoA for all other languages. Thus, one or more of the “Additional Languages” may in fact have been acquired before English and/or German.

## S2: Descriptions for self-rated assessment of language skills, following the Council of Europe (2001) definitions

### A: Elementary language use

#### A1 - Beginner (Breakthrough)

Can understand and use familiar everyday expressions and very basic phrases aimed at the satisfaction of needs of a concrete type. Can introduce him/herself and others and ask questions about personal details such as where he/she lives, people he/she knows and things he/she has, and can respond to questions of this type. Can communicate in a simple way when interlocutors speak slowly and clearly and are prepared to help.

#### A2 - Basic knowledge (Waystage)

Can understand sentences and frequently used expressions related to areas of most immediate relevance (for example, personal and family information, shopping, work, local area). Can communicate in simple, routine situations involving a simple and direct exchange of information on familiar and routine matters. Can describe in simple terms own background and education, immediate environment and things related to immediate needs.

### B: Independent use of language

#### B1 - Advanced Language Use (Threshold)

Can understand the main points of clear standard input on familiar matters regularly encountered in work, school, leisure and so on. Can cope with most situations encountered when traveling in the language area. Can express him/herself simply and coherently on familiar topics and personal areas of interest. Can describe experiences and events, dreams, hopes and ambitions, and give brief reasons or explanations for plans and opinions.

## B2 - Independent use of language (Vantage)

Can understand the main ideas of complex texts on both concrete and abstract topics, including technical discussions in his/her field of specialization. Can communicate with sufficient fluency and spontaneity to hold a normal conversation with native speakers without strain for either party. Can express him/herself clearly and in detail on a wide range of subjects, explaining a point of view on a topical issue and giving the advantages and disadvantages of various options.

## C: Proficient use of language

### C1 - Effective Operational Proficiency.

Can understand a wide range of demanding, longer texts and grasp implicit meaning. Can express him/herself fluently and spontaneously without having to search for clearly identifiable words. Can use language effectively and flexibly in social and professional life or in training and study. Can express him/herself clearly, in a structured and detailed way on complex subjects, making appropriate use of various means of linking texts.

### C2 - Approximate native speaker proficiency (Mastery).

Can understand with ease virtually everything read or heard. Can summarize information from a variety of written and spoken sources, giving reasons and explanations in a coherent presentation. Can express him/herself spontaneously, very fluently and accurately, making clear finer shades of meaning even in more complex situations.

## S3: Language Questionnaire

|   | Variable                                                                 | Question in English Version                                                                                                                                                   | Question in German Version                                                                                                                                        | Response Format                                                                                                      |
|---|--------------------------------------------------------------------------|-------------------------------------------------------------------------------------------------------------------------------------------------------------------------------|-------------------------------------------------------------------------------------------------------------------------------------------------------------------|----------------------------------------------------------------------------------------------------------------------|
| 1 | Age                                                                      | How old are you? (in years)                                                                                                                                                   | Wie alt bist du?                                                                                                                                                  | Free input                                                                                                           |
| 2 | Gender                                                                   | What is your gender?                                                                                                                                                          | Mit welchem Geschlecht identifizierst du dich?                                                                                                                    | <ul style="list-style-type: none"><li>○ Male</li><li>○ Female</li><li>○ Diverse</li><li>○ No specification</li></ul> |
| 3 | Residence                                                                | In which country are you currently living?                                                                                                                                    | In welchem Land wohnst du aktuell?                                                                                                                                | Free input                                                                                                           |
| 4 | Total duration of residence in Germany / Austria                         | How long have you been living there altogether? (in total/sum, this can be the time since your birth if you were born in that country) – Please state your answer in MONTHS – | Wie lange wohnst du dort insgesamt schon? (Gesamtsumme; das kann auch die Zeit seit deiner Geburt sein, wenn du dort geboren wurdest) – Angabe bitte in MONATEN – | Free input                                                                                                           |
| 5 | Duration of residence in Germany / Austria since last international move | How long have you currently been living in that country? (since you last moved internationally) – Please state your answer in MONTHS –                                        | Wie lange wohnst du aktuell in diesem Land? (seit deinem letzten internationalen Umzug) – Angabe bitte in MONATEN –                                               | Free input                                                                                                           |
| 6 | Native Language                                                          | What is/are your native language(s)?                                                                                                                                          | Was ist/sind deine Muttersprache(n)?                                                                                                                              | Free input                                                                                                           |

|    |                                   |                                                                                                                    |                                                                                                                   |            |
|----|-----------------------------------|--------------------------------------------------------------------------------------------------------------------|-------------------------------------------------------------------------------------------------------------------|------------|
| 7  | Age of first language acquisition | At what age did you start learning German?                                                                         | Mit wie vielen Jahren hast du angefangen, Deutsch zu lernen?                                                      | Free input |
| 8  | Age of first language acquisition | At what age did you start learning English?                                                                        | Mit wie vielen Jahren hast du angefangen, Englisch zu lernen?                                                     | Free input |
| 9  | Occupation                        | What are you studying?/What are you working as?                                                                    | Was studierst du?/Was ist dein Beruf?                                                                             | Free input |
| 10 | Working language                  | In what language do you mainly study/work?                                                                         | In welcher Sprache studiert/arbeitest du vor allem?                                                               | Free input |
| 11 | Language use in everyday life     | Which language do you mainly use in your everyday life in contact with others?                                     | Welche Sprache nutzt du im Alltag im Kontakt mit anderen am meisten?                                              | Free input |
| 12 | Use of language in thoughts       | What language do you mainly use "with yourself" (for example when thinking or dreaming, when taking notes, etc.)   | Welche Sprache nutzt du am meisten "mit dir selbst"? (zum Beispiel in Gedanken, Träumen, Notizen schreiben, etc.) | Free input |
| 13 | other foreign languages           | Do you speak any other languages that were not listed before? Please also name your level of language proficiency! | Sprichst du noch weitere Fremdsprachen, die hier bisher nicht abgefragt wurden? Gib auch dein Niveau an!          | Free input |
| 14 |                                   | Do you want to tell us anything else about your linguistic background?                                             | Möchtest du uns noch etwas zu deinem sprachlichen Hintergrund mitteilen?                                          | Free input |

#### S4: Immersion Questionnaire

| Question                                                                                                  | Translation of the Question in English                                                        | Response Format                                                                                                                                                                                                                            |
|-----------------------------------------------------------------------------------------------------------|-----------------------------------------------------------------------------------------------|--------------------------------------------------------------------------------------------------------------------------------------------------------------------------------------------------------------------------------------------|
| Ich habe bedeutsame soziale Interaktionen mit Einheimischen (lokale Bevölkerung, Deutschmuttersprachler). | I have meaningful social interactions with locals (local population, native German speakers). | 7-level scale: <ul style="list-style-type: none"> <li>○ I do not agree at all</li> <li>○ I do not agree</li> <li>○ I tend to disagree</li> <li>○ Neither</li> <li>○ I tend to agree</li> <li>○ I agree</li> <li>○ I agree fully</li> </ul> |
| Ich habe tiefgründige und bedeutsame Konversationen mit deutschsprachigen Freunden                        | I have deep and meaningful conversations with German speaking friends                         |                                                                                                                                                                                                                                            |
| Ich knüpfe Kontakte mit Einheimischen und bin hier unter Leuten.                                          | I make contacts with locals and am among people here.                                         |                                                                                                                                                                                                                                            |

|                                                                                                             |                                                                                            |                                                                                                                                                                                                                                               |
|-------------------------------------------------------------------------------------------------------------|--------------------------------------------------------------------------------------------|-----------------------------------------------------------------------------------------------------------------------------------------------------------------------------------------------------------------------------------------------|
| Ich verbringe viel Zeit damit, Einheimische zu treffen und mit ihnen zu reden.                              | I spend a lot of time meeting and talking to locals.                                       |                                                                                                                                                                                                                                               |
| Ich lerne Deutsch, indem ich mit Einheimischen rede (durch das Sprechen mit Einheimischen)                  | I learn German by talking to locals (by speaking with locals)                              |                                                                                                                                                                                                                                               |
| Ich nutze generell Deutsch, um mit Einheimischen zu reden                                                   | I generally use German to talk with locals                                                 |                                                                                                                                                                                                                                               |
| Ich habe ein besseres Verständnis der deutschen Sprache durch einen Aufenthalt hier (durch das Wohnen hier) | I have a better understanding of the German language through my stay here (by living here) |                                                                                                                                                                                                                                               |
| Ich habe lange Konversationen mit Deutschmuttersprachlern auf Deutsch                                       | I have long conversations with native German speakers in German                            |                                                                                                                                                                                                                                               |
| Sprichst du Deutsch mit Mitbewohnern?                                                                       | Do you speak German with roommates?                                                        | 7-level scale:<br><ul style="list-style-type: none"> <li>○ never</li> <li>○ very rarely</li> <li>○ rarely</li> <li>○ sometimes</li> <li>○ frequently</li> <li>○ very frequently</li> <li>○ always</li> </ul> + option “not specified”         |
| Sprichst du Deutsch auf der Arbeit?                                                                         | Do you speak German at work?                                                               |                                                                                                                                                                                                                                               |
| Sprichst du Deutsch im Studium?                                                                             | Do you speak German in your studies?                                                       |                                                                                                                                                                                                                                               |
| Sprichst du Deutsch bei regelmäßigen Freizeitaktivitäten?                                                   | Do you speak German during regular leisure activities?                                     |                                                                                                                                                                                                                                               |
| Sprichst du Deutsch mit Personen aus deinem Heimatland?                                                     | Do you speak German with people from your home country?                                    |                                                                                                                                                                                                                                               |
| Sprichst du Deutsch mit anderen internationalen Studenten?                                                  | Do you speak German with other international students?                                     | 7-level scale:<br><ul style="list-style-type: none"> <li>○ I do not agree at all</li> <li>○ I do not agree</li> <li>○ I tend to disagree</li> <li>○ Neither</li> <li>○ I tend to agree</li> <li>○ I agree</li> <li>○ I agree fully</li> </ul> |
| Ich habe viel Kontakt mit Menschen aus meinem Heimatland hier.                                              | I have a lot of contact with people from my home country here.                             |                                                                                                                                                                                                                                               |
| Ich verbringe viel Zeit damit, Menschen aus meinem Heimatland zu treffen und mit ihnen zu reden.            | I spend a lot of time meeting and talking to people from my home country.                  |                                                                                                                                                                                                                                               |
| Ich habe bedeutsame soziale Interaktionen mit Menschen aus meinem Heimatland.                               | I have meaningful social interactions with people from my home countries.                  |                                                                                                                                                                                                                                               |
| Ich versuche, Menschen aus meinem Heimatland hier kennenzulernen.                                           | I try to get to know people from my home country here.                                     |                                                                                                                                                                                                                                               |

|                                                                                 |                                                                             |                                                                                                                                                                                                                                            |
|---------------------------------------------------------------------------------|-----------------------------------------------------------------------------|--------------------------------------------------------------------------------------------------------------------------------------------------------------------------------------------------------------------------------------------|
| Telefonierst du mit Freunden/Familien zuhause (auch über Video)?                | Do you make phone calls to friends/families at home (including video)?      | 7-level scale: <ul style="list-style-type: none"> <li>○ never</li> <li>○ very rarely</li> <li>○ rarely</li> <li>○ sometimes</li> <li>○ frequently</li> <li>○ very frequently</li> <li>○ always</li> </ul> + option “not specified”         |
| Schreibst du mit Freunden/Familie zuhause (z.B. Textnachrichten über WhatsApp)? | Do you text with friends/family at home (e.g., text messages via WhatsApp)? |                                                                                                                                                                                                                                            |
| Ich fühle mich gut in Deutschland (bzw. Österreich) integriert.                 | I feel well integrated in Germany (or Austria).                             | 7-level scale: <ul style="list-style-type: none"> <li>○ I do not agree at all</li> <li>○ I do not agree</li> <li>○ I tend to disagree</li> <li>○ Neither</li> <li>○ I tend to agree</li> <li>○ I agree</li> <li>○ I agree fully</li> </ul> |
| Ich lasse mich auf die deutsche (bzw. österreichische) Kultur ein.              | I get involved with German (or Austrian) culture.                           |                                                                                                                                                                                                                                            |
| Es ist mir wichtig, mich gut in Deutschland (bzw. Österreich) zu integrieren.   | It is important for me to integrate well in Germany (or Austria).           |                                                                                                                                                                                                                                            |
| Es ist mir wichtig, Freundschaften mit Deutschmuttersprachlern aufzubauen.      | It is important to me to build friendships with native German speakers.     |                                                                                                                                                                                                                                            |

## S5: Stimulus lists for all experiments

### Version A

#### Task 1: Translation from English to German

| <i>Mixed List</i>  |                     | <i>Organized List (Vehicles)</i> |                     | <i>Abstract List</i> |                     |
|--------------------|---------------------|----------------------------------|---------------------|----------------------|---------------------|
| Stimulus<br>(Word) | Response<br>example | Stimulus<br>(Word)               | Response<br>example | Stimulus<br>(Word)   | Response<br>example |
| mushroom           | Pilz                | car                              | Auto                | sadness              | Traurigkeit         |
| cup                | Tasse               | tram                             | Straßenbahn         | fun                  | Spaß                |
| peace              | Frieden             | bicycle                          | Fahrrad             | belief               | Glaube              |
| library            | Bibliothek          | submarine                        | U-Boot              | joy                  | Freude              |
| potato             | Kartoffel           | train                            | Zug                 | fear                 | Angst               |
| trousers           | Hose                | truck                            | LKW                 | laziness             | Faulheit            |
| fridge             | Kühlschrank         | cable car                        | Seilbahn            | superstition         | Aberglaube          |
| hospital           | Krankenhaus         | metro                            | U-Bahn              | anger                | Ärger               |
| skirt              | Rock                | plane                            | Flugzeug            | wish                 | Wunsch              |
| pain               | Schmerz             | caravan                          | Wohnwagen           | adventure            | Abenteuer           |

#### Task 2: Translation from German to English

| <i>Mixed List</i>  |                     | <i>Organized List (Fruit)</i> |                     | <i>Abstract List</i> |                     |
|--------------------|---------------------|-------------------------------|---------------------|----------------------|---------------------|
| Stimulus<br>(Word) | Response<br>example | Stimulus<br>(Word)            | Response<br>example | Stimulus<br>(Word)   | Response<br>example |
| Gurke              | cucumber            | Kirsche                       | cherry              | Stolz                | pride               |
| Meinung            | opinion             | Himbeere                      | raspberry           | Erinnerung           | memory              |
| Teller             | plate               | Zitrone                       | lemon               | Schwäche             | weakness            |
| Handschuhe         | gloves              | Erdbeere                      | strawberry          | Glück                | luck                |
| Schwimmhalle       | swimming<br>pool    | Ananas                        | pineapple           | Ehre                 | honour              |
| Kürbis             | pumpkin             | Weintraube                    | grape               | Feind                | enemy               |
| Messer             | knife               | Pflaume                       | plum                | Hilfsbereitschaft    | helpfulness         |
| Kleid              | dress               | Erdnuss                       | peanut              | Mut                  | courage             |
| Geheimnis          | secret              | Pfirsich                      | peach               | Enttäuschung         | disappointment      |
| Kino               | cinema              | Brombeere                     | blackberry          | Gefühl               | feeling             |

#### Task 3: Picture Naming in German

| <i>Mixed List</i>  |                  | <i>Organized List (Furniture)</i> |                  |
|--------------------|------------------|-----------------------------------|------------------|
| Stimulus (Picture) | Response example | Stimulus (Picture)                | Response example |
| corn               | Mais             | window                            | Fenster          |



|         |              |          |                |
|---------|--------------|----------|----------------|
| freezer | Gefriertruhe | shelf    | Regal          |
| church  | Kirche       | chair    | Stuhl          |
| kettle  | Wasserkocher | table    | Tisch          |
| beans   | Bohne        | clock    | Uhr            |
| suit    | Anzug        | wardrobe | Kleiderschrank |
| tower   | Turm         | door     | Tür            |
| cap     | Mütze        | bath tub | Badewanne      |
| stove   | Herd         | carpet   | Teppich        |
| bra     | BH           | sink     | Waschbecken    |

#### Task 4: Picture Naming in English

| <i>Mixed List</i>  |                  | <i>Organized List (Stationery)</i> |                  |
|--------------------|------------------|------------------------------------|------------------|
| Stimulus (Picture) | Response example | Stimulus (Picture)                 | Response example |
| pot                | pot              | ruler                              | ruler            |
| boots              | boots            | pen                                | pen              |
| garlic             | garlic           | glue                               | glue             |
| airport            | airport          | tape                               | tape             |
| coat               | coat             | scissors                           | scissors         |
| fork               | fork             | eraser                             | rubber, eraser   |
| onion              | onion            | pencil                             | pencil           |
| scarf              | scarf            | folder                             | folder           |
| spoon              | spoon            | bin                                | bin              |
| castle             | castle           | pencil case                        | pencil case      |

#### Experiment Version B

##### Task 1: Translation from English to German

| <i>Mixed List</i> |                  | <i>Organized List (buildings)</i> |                  | <i>Abstract list</i> |                  |
|-------------------|------------------|-----------------------------------|------------------|----------------------|------------------|
| Stimulus (Word)   | Response example | Stimulus (Word)                   | Response example | Stimulus (Word)      | Response example |
| clock             | Uhr              | hospital                          | Krankenhaus      | error                | Fehler           |
| ruler             | Lineal           | gym                               | Sporthalle       | love                 | Liebe            |
| raspberry         | Himbeere         | castle                            | Burg/Schloss     | secret               | Geheimnis        |
| metro             | U-Bahn           | swimming pool                     | Schwimmhalle     | hatred               | Hass             |
| carpet            | Teppich          | tower                             | Turm             | curiosity            | Neugierde        |
| sadness           | Traurigkeit      | library                           | Bibliothek       | thought              | Gedanke          |
| blackberry        | Brombeere        | church                            | Kirche           | exhaustion           | Erschöpfung      |
| tape              | Klebeband        | airport                           | Flugzeug         | hazard               | Zufall, Gefahr   |

|         |             |        |          |           |            |
|---------|-------------|--------|----------|-----------|------------|
| feeling | Gefühl      | cinema | Kino     | discovery | Entdeckung |
| tram    | Straßenbahn | shop   | Geschäft | peace     | Frieden    |

#### Task 2: Translation from German to English

| <i>Mixed List</i>  |                     | <i>Organized List (vegetables)</i> |                     | <i>Abstract List</i> |                     |
|--------------------|---------------------|------------------------------------|---------------------|----------------------|---------------------|
| Stimulus<br>(Word) | Response<br>example | Stimulus<br>(Word)                 | Response<br>example | Stimulus<br>(Word)   | Response<br>example |
| Kirsche            | cherry              | Gurke                              | cucumber            | Schmerz              | pain                |
| Auto               | car                 | Blumenkohl                         | cauliflower         | Hoffnung             | hope                |
| Papierkorb         | bin                 | Knoblauch                          | garlic              | Wissen               | knowledge           |
| Erinnerung         | memory              | Bohne                              | bean                | Zweifel              | doubt               |
| Kleber             | glue                | Mais                               | corn                | Vertrauen            | trust               |
| Wunsch             | wish                | Kartoffel                          | potato              | Müdigkeit            | tiredness           |
| Zug                | train               | Zwiebel                            | onion               | Verlust              | loss                |
| Tisch              | table               | Ingwer                             | ginger              | Geburtstag           | birthday            |
| Pflaume            | plum                | Kürbis                             | pumpkin             | Schuld               | guilt, fault        |
| Fenster            | window              | Pilz                               | mushroom            | Meinung              | opinion             |

#### Task 3: Picture Naming in German

| <i>Mixed List</i>  |                  | <i>Organized List (kitchenware)</i> |                  |
|--------------------|------------------|-------------------------------------|------------------|
| Stimulus (Picture) | Response example | Stimulus (Picture)                  | Response example |
| shelf              | Regal            | fridge                              | Kühlschrank      |
| file               | Ordner           | knife                               | Messer           |
| pineapple          | Ananas           | cup                                 | Tasse            |
| pencil case        | Federmappe       | stove                               | Herd             |
| door               | Tür              | fork                                | Gabel            |
| peanut             | Erdnuss          | freezer                             | Gefriertruhe     |
| caravan            | Wohnmobil        | pot                                 | Topf             |
| lemon              | Zitrone          | spoon                               | Löffel           |
| pencil             | Bleistift        | kettle                              | Wasserkocher     |
| truck              | LKW              | plate                               | Teller           |

#### Task 4: Picture Naming in English

| <i>Mixed List</i>  |                  | <i>Organized List (clothing)</i> |                  |
|--------------------|------------------|----------------------------------|------------------|
| Stimulus (Picture) | Response example | Stimulus (Picture)               | Response example |
| strawberry         | strawberry       | trousers                         | trousers, pants  |
| bicycle            | bicycle          | dress                            | dress            |
| wardrobe           | wardrobe         | boots                            | boots            |

|          |                |        |          |
|----------|----------------|--------|----------|
| scissors | scissors       | gloves | gloves   |
| plane    | plane          | coat   | coat     |
| chair    | chair          | cap    | cap, hat |
| peach    | peach          | suit   | suit     |
| eraser   | rubber, eraser | bra    | bra      |
| grapes   | grapes         | skirt  | skirt    |
| pen      | pen            | scarf  | scarf    |

---

Examples of Picture Stimuli as from the BOSS inventory (Brodeur et al., 2010):

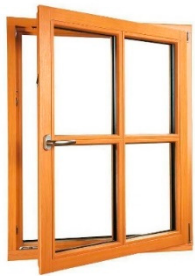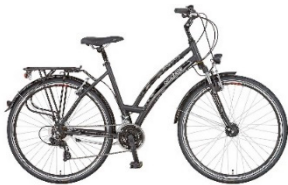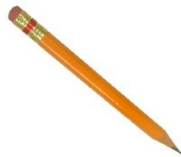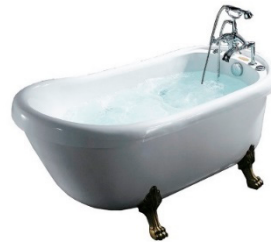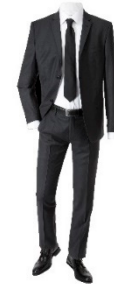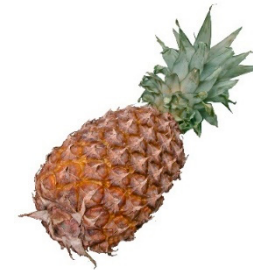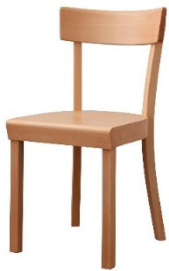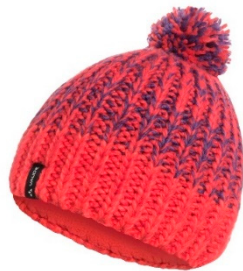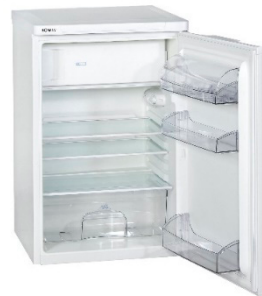

# S6: Experiment 1, Language variables: Means, standard deviations, and Pearson's correlations.

| Variable                | M     | SD    | 1     | 2      | 3     | 4     | 5     | 6     | 7     | 8      | 9     | 10    | 11    | 12    | 13     | 14     | 15   | 16     | 17   | 18   |
|-------------------------|-------|-------|-------|--------|-------|-------|-------|-------|-------|--------|-------|-------|-------|-------|--------|--------|------|--------|------|------|
| 1. Age                  | 38.02 | 11.29 |       |        |       |       |       |       |       |        |       |       |       |       |        |        |      |        |      |      |
| 2. Proficiency G        | 4.98  | 0.89  | -.06  |        |       |       |       |       |       |        |       |       |       |       |        |        |      |        |      |      |
| 3. Proficiency E        | 4.44  | 1.01  | -.21  | .04    |       |       |       |       |       |        |       |       |       |       |        |        |      |        |      |      |
| 4. Production G         | 5.91  | 0.97  | .03   | .57**  | .06   |       |       |       |       |        |       |       |       |       |        |        |      |        |      |      |
| 5. Production E         | 4.49  | 1.46  | -.17  | -.11   | .68** | .26   |       |       |       |        |       |       |       |       |        |        |      |        |      |      |
| 6. Reception G          | 6.00  | 0.79  | .04   | .51**  | .00   | .86** | .12   |       |       |        |       |       |       |       |        |        |      |        |      |      |
| 7. Reception E          | 5.09  | 1.18  | -.08  | -.06   | .63** | .32*  | .75** | .21   |       |        |       |       |       |       |        |        |      |        |      |      |
| 8. AoA G                | 19.84 | 8.53  | .44** | -.61** | .09   | -.32* | .15   | -.34* | .23   |        |       |       |       |       |        |        |      |        |      |      |
| 9. AoA E                | 10.60 | 4.68  | .41** | .20    | -.23  | .12   | -.10  | .08   | -.09  | .03    |       |       |       |       |        |        |      |        |      |      |
| 10. Work G              | 0.69  | 0.47  | -.06  | .47**  | .01   | .44** | -.01  | .40** | .01   | -.52** | -.03  |       |       |       |        |        |      |        |      |      |
| 11. Work E              | 0.27  | 0.45  | -.32* | -.33*  | .33*  | -.26  | .46** | -.27  | .30*  | .19    | -.36* | -.35* |       |       |        |        |      |        |      |      |
| 12. Work M              | 0.40  | 0.50  | .63** | -.03   | -.27  | -.02  | -.31* | .06   | -.22  | .33*   | .23   | -.14  | -.08  |       |        |        |      |        |      |      |
| 13. Daily Life G        | 0.69  | 0.47  | .25   | .53**  | -.13  | .54** | -.04  | .57** | -.03  | -.18   | .19   | .38*  | -.25  | .06   |        |        |      |        |      |      |
| 14. Daily Life E        | 0.22  | 0.42  | -.24  | -.47** | .40** | -.23  | .49** | -.35* | .32*  | .19    | -.24  | -.33* | .52** | -.11  | -.68** |        |      |        |      |      |
| 15. Daily Life M        | 0.33  | 0.48  | .11   | -.09   | -.17  | -.33* | -.37* | -.26  | -.34* | .08    | .29   | -.24  | -.11  | .38** | -.24   | -.15   |      |        |      |      |
| 16. Thoughts G          | 0.40  | 0.50  | .06   | .59**  | .05   | .41** | -.09  | .30*  | -.02  | -.33*  | .27   | .55** | -.18  | .07   | .55**  | -.44** | -.10 |        |      |      |
| 17. Thoughts E          | 0.13  | 0.34  | -.18  | .08    | .28   | .24   | .14   | .17   | .19   | .01    | .10   | .12   | .06   | -.05  | .26    | -.05   | .00  | .35*   |      |      |
| 18. Thoughts M          | 0.78  | 0.42  | .15   | -.26   | -.14  | -.22  | -.12  | -.21  | .04   | .21    | -.02  | -.24  | -.16  | -.00  | -.24   | .03    | .04  | -.44** | -.26 |      |
| 19. Number of Languages | 4.11  | 1.17  | .12   | .42**  | .13   | .35*  | .14   | .28   | .29   | -.23   | .09   | .23   | -.10  | .08   | .35*   | -.24   | -.03 | .35*   | .02  | -.18 |

Note. G, E and M indicate German, English and Mother Tongue, respectively. Proficiency was measured on a 6-point scale with higher values for higher proficiency. Productive and receptive use of German and English were assessed on 7-point scales with higher values reflecting more frequent use. The remaining variables were coded with 1 if it applied to the participant, and with 0 if it did not. \*  $p < .05$ . \*\*  $p < .01$ .

## S7: Experiment 1: Estimated Marginal Means and respective Confidence Intervals for Response Language and List Type.

### (a) Translation

| Response Language        | List Type       | Accuracy |      |     |       |      | Response Times |    |     |      |      |
|--------------------------|-----------------|----------|------|-----|-------|------|----------------|----|-----|------|------|
|                          |                 | emmean   | SE   | df  | ALCL  | AUCL | emmean         | SE | df  | LCL  | UCL  |
| Translating into German  | Mixed Lists     | 1.61     | 0.32 | Inf | 0.98  | 2.24 | 1591           | 71 | 147 | 1449 | 1733 |
|                          | Organized Lists | 1.93     | 0.33 | Inf | 1.28  | 2.57 | 1518           | 71 | 147 | 1376 | 1660 |
|                          | Abstract Lists  | 1.54     | 0.32 | Inf | 0.92  | 2.16 | 1504           | 71 | 146 | 1362 | 1645 |
| Translating into English | Mixed Lists     | 1.29     | 0.33 | Inf | 0.66  | 1.93 | 1653           | 74 | 152 | 1507 | 1800 |
|                          | Organized Lists | 0.15     | 0.32 | Inf | -0.47 | 0.78 | 1857           | 77 | 171 | 1704 | 2010 |
|                          | Abstract Lists  | 1.35     | 0.33 | Inf | 0.71  | 1.98 | 1797           | 74 | 151 | 1651 | 1944 |

*Note.* Estimated marginal means (emmeans) and 95% confidence intervals were obtained using the *emmeans* function. The accuracy values are provided on the logit scale; no degrees of freedom are available for generalized linear mixed models. ALCL and AUCL refer to asymptotic lower and upper confidence limit, respectively.

### (b) Picture Naming

| Response Language | List Type       | Accuracy |      |     |      |      | Response Times |    |     |      |      |
|-------------------|-----------------|----------|------|-----|------|------|----------------|----|-----|------|------|
|                   |                 | emmean   | SE   | df  | ALCL | AUCL | emmean         | SE | df  | LCL  | UCL  |
| Naming in German  | Mixed Lists     | 2.43     | 0.33 | Inf | 1.78 | 3.08 | 1515           | 68 | 108 | 1380 | 1649 |
|                   | Organized Lists | 3.12     | 0.36 | Inf | 2.41 | 3.83 | 1347           | 68 | 106 | 1213 | 1481 |
| Naming in English | Mixed Lists     | 1.63     | 0.29 | Inf | 1.05 | 2.21 | 1470           | 69 | 110 | 1333 | 1607 |
|                   | Organized Lists | 1.29     | 0.29 | Inf | 0.72 | 1.86 | 1580           | 70 | 113 | 1442 | 1718 |

*Note.* Estimated marginal means (emmeans) and 95% confidence intervals were obtained using the *emmeans* function. The accuracy values are provided on the logit scale; no degrees of freedom are available for generalized linear mixed models. ALCL and AUCL refer to asymptotic lower and upper confidence limit, respectively.

## S8: Experiment 1: Immersion results.

*Correlations between immersion sub-scores, asymmetry and category interference.*

| Variable                                                           | Immersion<br>(total score) | Sub-score 1:<br>Social<br>interaction<br>with host<br>nationals | Sub-score 2:<br>Language<br>development<br>and use | Sub-score<br>3: Social<br>interaction<br>with co-<br>nationals | Sub-score 4:<br>Subjective<br>integration |
|--------------------------------------------------------------------|----------------------------|-----------------------------------------------------------------|----------------------------------------------------|----------------------------------------------------------------|-------------------------------------------|
| 1. Asymmetry RT Picture<br>Naming                                  | .24                        | .24                                                             | .44**                                              | -.07                                                           | .26                                       |
| 2. Asymmetry RT<br>Translation                                     | .14                        | .13                                                             | .13                                                | -.11                                                           | .19                                       |
| 3. Asymmetry Accuracy<br>Picture Naming                            | .21                        | .23                                                             | .29*                                               | -.09                                                           | .38**                                     |
| 4. Asymmetry Accuracy<br>Translation                               | .23                        | .24                                                             | .31*                                               | -.06                                                           | .38*                                      |
| 5. Category Interference RT<br>German-English Translation          | -.04                       | -.17                                                            | .18                                                | -.16                                                           | .23                                       |
| 6. Category Interference RT<br>English Picture Naming              | .08                        | -.12                                                            | .04                                                | .18                                                            | .14                                       |
| 7. Category Interference<br>Accuracy German-English<br>Translation | .09                        | -.05                                                            | .07                                                | .21                                                            | -.09                                      |
| 8. Category Interference<br>Accuracy English Picture<br>Naming     | -.08                       | -.08                                                            | -.08                                               | .11                                                            | .03                                       |

*Note.* \*  $p < .05$ . \*\*  $p < .01$ .

## S9: Experiment 2: Overview of participants' language skills

| Participant | L1                            | L2                                 | L3      | Additional Languages     | Country of Residence | Language Count |
|-------------|-------------------------------|------------------------------------|---------|--------------------------|----------------------|----------------|
| 1           | Spanish                       | English                            | German  | Latin                    | Germany              | 4              |
| 1006        | Spanish                       | German                             | English | Portuguese, Italian      | Germany              | 5              |
| 1108        | Russian                       | English                            | German  | -                        | Germany              | 3              |
| 1380        | Persian                       | English                            | German  | -                        | Austria              | 3              |
| 1979        | Portuguese                    | English                            | German  | -                        | Germany              | 3              |
| 2206        | Portuguese                    | English                            | German  | Spanish, French          | Germany              | 5              |
| 2309        | Portuguese                    | English                            | German  | French                   | Germany              | 4              |
| 4354        | Chinese                       | English                            | German  | Spanish                  | Austria              | 4              |
| 4869        | Dutch                         | German                             | English | -                        | Germany              | 3              |
| 907         | Portuguese                    | English                            | German  | Italian                  | Germany              | 4              |
| 1312        | Dutch                         | Languages acquired at the same age |         | French                   | Germany              | 4              |
| 1791        | Spanish                       | English                            | German  | -                        | Germany              | 3              |
| 1982        | Slavic-Upper Silesian Dialect | English                            | German  | Polish                   | Germany              | 5              |
| 4833        | Italian                       | English                            | German  | Spanish, French, Russian | Germany              | 6              |
| 6842        | Portuguese                    | English                            | German  | -                        | Germany              | 3              |
| 7410        | Portuguese                    | Languages acquired at the same age |         | French                   | Germany              | 4              |
| 1280        | Arabic                        | English                            | German  | -                        | Germany              | 3              |
| 1406        | Hungarian                     | German                             | English | Turkish, Italian         | Germany              | 5              |
| 1583        | Russian                       | German                             | English | -                        | Germany              | 3              |
| 1607        | Portuguese                    | German                             | English | Italian                  | Germany              | 4              |

|      |             |         |         |                                     |         |   |
|------|-------------|---------|---------|-------------------------------------|---------|---|
| 1698 | Fula        | German  | English | French, Spanish                     | Germany | 5 |
| 2711 | Dutch       | English | German  | Portuguese, Serbian, French         | Germany | 6 |
| 3147 | Portuguese  | English | German  | -                                   | Germany | 3 |
| 7242 | Arabic      | English | German  | -                                   | Germany | 3 |
| 909  | Azerbaijani | English | German  | Turkish, Russian, Talish, Arabic    | Germany | 7 |
| 304  | Arabic      | German  | English | French, Amazigh                     | Germany | 5 |
| 1304 | Italian     | English | German  | -                                   | Germany | 3 |
| 1502 | Arabic      | English | German  | Russian                             | Germany | 4 |
| 1853 | French      | English | German  | Spanish, Polish, Italian            | Germany | 6 |
| 1983 | Turkish     | English | German  | -                                   | Germany | 3 |
| 2605 | French      | German  | English | Spanish                             | Germany | 4 |
| 1998 | Armenian    | English | German  | Russian                             | Germany | 4 |
| 9198 | Bulgarian   | English | German  | Russian                             | Germany | 4 |
| 1111 | French      | English | German  | -                                   | Germany | 3 |
| 1984 | Hungarian   | German  | English | -                                   | Germany | 3 |
| 1611 | Georgian    | English | German  | Russian, Italian, Spanish           | Germany | 6 |
| 1996 | Russian     | English | German  | Ukrainian, Spanish, Swedish, French | Germany | 7 |
| 1904 | Spanish     | English | German  | French                              | Germany | 4 |
| 6149 | Hindi       | German  | English | Finnish, Sanskrit                   | Germany | 5 |
| 7778 | Spanish     | English | German  | Italian, French                     | Germany | 5 |
| 2301 | Italian     | English | German  | -                                   | Germany | 3 |

---

*Note:* While English and German appear here as L2 and L3 (or vice versa) for all participants in the sequentially correct order of acquisition, we did not ask AoA for all other languages. Thus, one or more of the “Additional Languages” may in fact have been acquired before English and/or German.



## S10: Experiment 2: Descriptive Values for Language and Residence Variables in the Total Sample and Experimental Groups (German and English Instructions).

| Variable                       | Overall (N = 41) |       |         | German Instructions (N = 19) |       |            | English Instructions (N = 22) |       |         |
|--------------------------------|------------------|-------|---------|------------------------------|-------|------------|-------------------------------|-------|---------|
|                                | Mean             | SD    | Range   | Mean                         | SD    | Range      | Mean                          | SD    | Range   |
| Age                            | 32.78            | 12.39 | 18-75   | 33.84                        | 12.45 | 20-59      | 31.86                         | 12.56 | 18-75   |
| Proficiency G                  | 4.88             | 0.84  | 3-6     | 4.79                         | 0.85  | 3-6        | 4.95                          | 0.84  | 3-6     |
| Proficiency E                  | 4.39             | 0.97  | 2-6     | 4.58                         | 0.77  | 3-6        | 4.23                          | 1.11  | 2-6     |
| Age of Acquisition G           | 18.02            | 8.94  | 5-37    | 18.89                        | 10.13 | 5-37       | 17.27                         | 7.94  | 6-37    |
| Age of Acquisition E           | 11.41            | 4.17  | 6-25    | 11.26                        | 3.71  | 6-20       | 11.55                         | 4.62  | 6-25    |
| Duration of Learning G         | 14.76            | 10.42 | 1-55    | 14.95                        | 8.83  | 4-41       | 14.59                         | 11.83 | 1-55    |
| Duration of Learning E         | 21.37            | 11.17 | 6-50    | 22.58                        | 11.82 | 6-45       | 20.32                         | 10.75 | 6-50    |
| Number of Languages            | 4.15             | 1.17  | 3-7     | 4                            | 1     | 3-6        | 4.27                          | 1.32  | 3-7     |
| Total Years of residence       | 10.31            | 9.79  | 0.42-50 | 10.74                        | 9.6   | 0.83-40.58 | 9.95                          | 10.16 | 0.42-50 |
| Contextual Usage of Languages: | Percentage (%)   |       |         | Percentage (%)               |       |            | Percentage (%)                |       |         |
| Daily Life G                   | 82.93            |       |         | 41.46                        |       |            | 41.46                         |       |         |
| Daily Life E                   | 19.51            |       |         | 9.76                         |       |            | 9.76                          |       |         |
| Daily Life M                   | 21.95            |       |         | 9.76                         |       |            | 12.2                          |       |         |
| Work G                         | 85.37            |       |         | 39.02                        |       |            | 46.34                         |       |         |
| Work E                         | 21.95            |       |         | 12.2                         |       |            | 9.76                          |       |         |
| Work M                         | 7.32             |       |         | 7.32                         |       |            | 0                             |       |         |
| Thoughts G                     | 31.71            |       |         | 12.2                         |       |            | 19.51                         |       |         |
| Thoughts E                     | 24.39            |       |         | 9.76                         |       |            | 14.63                         |       |         |
| Thoughts M                     | 73.17            |       |         | 34.15                        |       |            | 39.02                         |       |         |

*Note.* G, E and M indicate German, English and Mother Tongue, respectively. Proficiency was measured on a 6-point scale with higher values for higher proficiency. Age, Age of Acquisition (AoA), Duration of Language Learning, and Total Years of Residence in German/Austria were measured in years. Contextual Usage of Languages were coded with 1 if it applied to the participant, and with 0 if it did not. Total distribution exceeds 100% as it was possible to select multiple options for each context (e.g., language in daily life).

## S11. Experiment 2, language variables: Means, standard deviations, and Pearson's correlations.

| Variable                | <i>M</i> | <i>SD</i> | 1     | 2      | 3     | 4    | 5    | 6      | 7    | 8    | 9      | 10    | 11   | 12     | 13  | 14  |
|-------------------------|----------|-----------|-------|--------|-------|------|------|--------|------|------|--------|-------|------|--------|-----|-----|
| 1. Age                  | 32.78    | 12.39     |       |        |       |      |      |        |      |      |        |       |      |        |     |     |
| 2. Proficiency G        | 4.88     | 0.84      | .18   |        |       |      |      |        |      |      |        |       |      |        |     |     |
| 3. Proficiency E        | 4.39     | 0.97      | .01   | -.00   |       |      |      |        |      |      |        |       |      |        |     |     |
| 4. AoA G                | 18.02    | 8.94      | .56** | -.29   | .07   |      |      |        |      |      |        |       |      |        |     |     |
| 5. AoA E                | 11.41    | 4.17      | .45** | .01    | -.23  | .08  |      |        |      |      |        |       |      |        |     |     |
| 6. Work G               | 0.85     | 0.36      | .08   | .44**  | -.26  | -.05 | .23  |        |      |      |        |       |      |        |     |     |
| 7. Work E               | 0.22     | 0.42      | -.21  | -.35*  | .15   | -.12 | -.25 | -.61** |      |      |        |       |      |        |     |     |
| 8. Work M               | 0.07     | 0.26      | .07   | .04    | .18   | .23  | -.10 | -.15   | .30  |      |        |       |      |        |     |     |
| 9. Daily Life G         | 0.83     | 0.38      | .13   | .32*   | -.22  | -.01 | .06  | .36*   | -.23 | .13  |        |       |      |        |     |     |
| 10. Daily Life E        | 0.20     | 0.40      | -.23  | -.37*  | .18   | -.07 | -.00 | -.49** | .33* | -.14 | -.43** |       |      |        |     |     |
| 11. Daily Life M        | 0.22     | 0.42      | -.34* | .01    | .21   | -.20 | -.24 | .22    | -.14 | .08  | -.23   | -.11  |      |        |     |     |
| 12. Thoughts G          | 0.32     | 0.47      | .13   | .29    | -.39* | -.18 | .19  | .13    | .02  | .01  | .31*   | -.07  | -.23 |        |     |     |
| 13. Thoughts E          | 0.24     | 0.43      | -.22  | -.26   | .48** | -.15 | -.07 | -.41** | .25  | -.16 | -.04   | .44** | -.03 | -.02   |     |     |
| 14. Thoughts M          | 0.73     | 0.45      | -.03  | -.42** | .36*  | .36* | -.15 | -.25   | .32* | .17  | -.13   | .16   | -.08 | -.53** | .09 |     |
| 15. Number of Languages | 4.15     | 1.17      | -.18  | .07    | .41** | -.15 | -.24 | -.36*  | .03  | -.04 | -.39*  | .26   | .14  | -.13   | .27 | .08 |

*Note.* G, E and M indicate German, English and Mother Tongue, respectively. Proficiency was measured on a 6-point scale with higher values for higher proficiency. Productive and receptive use of German and English were assessed on 7-point scales with higher values reflecting more frequent use. The remaining variables were coded with 1 if it applied to the participant, and with 0 if it did not. \*  $p < .05$ . \*\*  $p < .01$ .

## S12. Experiment 2: Estimated marginal means and respective Confidence Intervals for Language Context, Response Language and List Type.

### (a) Translation

| Context<br>(Instructions) | Response Language<br>(Translating into) | List Type | Accuracy |      |     |       |      | Response Times |    |     |      |      |
|---------------------------|-----------------------------------------|-----------|----------|------|-----|-------|------|----------------|----|-----|------|------|
|                           |                                         |           | emmean   | SE   | df  | ALCL  | AUCL | emmean         | SE | df  | LCL  | UCL  |
| German                    | German                                  | Mixed     | 1.43     | 0.38 | Inf | 0.68  | 2.17 | 1731           | 86 | 154 | 1561 | 1900 |
|                           |                                         | Organized | 1.80     | 0.39 | Inf | 1.04  | 2.57 | 1586           | 85 | 150 | 1419 | 1754 |
|                           |                                         | Abstract  | 1.24     | 0.37 | Inf | 0.51  | 1.98 | 1605           | 86 | 157 | 1436 | 1775 |
|                           | English                                 | Mixed     | 0.91     | 0.40 | Inf | 0.14  | 1.69 | 1656           | 85 | 166 | 1489 | 1824 |
|                           |                                         | Organized | 0.44     | 0.39 | Inf | -0.33 | 1.20 | 1763           | 87 | 177 | 1592 | 1934 |
|                           |                                         | Abstract  | 0.83     | 0.39 | Inf | 0.06  | 1.59 | 1866           | 84 | 163 | 1700 | 2032 |
| English                   | German                                  | Mixed     | 0.87     | 0.36 | Inf | 0.16  | 1.58 | 1712           | 83 | 164 | 1547 | 1877 |
|                           |                                         | Organized | 1.60     | 0.38 | Inf | 0.86  | 2.33 | 1575           | 82 | 154 | 1413 | 1738 |
|                           |                                         | Abstract  | 0.95     | 0.36 | Inf | 0.24  | 1.66 | 1654           | 83 | 163 | 1490 | 1818 |
|                           | English                                 | Mixed     | 0.93     | 0.38 | Inf | 0.17  | 1.68 | 1768           | 81 | 164 | 1608 | 1928 |
|                           |                                         | Organized | -0.10    | 0.38 | Inf | -0.84 | 0.65 | 1826           | 86 | 197 | 1656 | 1995 |
|                           |                                         | Abstract  | 0.98     | 0.38 | Inf | 0.23  | 1.73 | 1778           | 81 | 162 | 1618 | 1938 |

*Note.* The Estimated Marginal Means (emmeans) and 95% confidence intervals were obtained using the emmeans function. Accuracy values are provided on the logit scale; no degrees of freedom are available for generalized linear mixed models, for RT Kenward-Roger degrees of freedom were used. ALCL and AUCL refer to asymptotic lower and upper confidence limit, respectively.

(b) Picture Naming

| Context<br>(Instructions) | Response Language<br>(Translating into) | List Type | Accuracy |      |     |       |      | Response Times |    |     |      |      |
|---------------------------|-----------------------------------------|-----------|----------|------|-----|-------|------|----------------|----|-----|------|------|
|                           |                                         |           | emmean   | SE   | df  | ALCL  | AUCL | emmean         | SE | df  | LCL  | UCL  |
| German                    | German                                  | Mixed     | 1.70     | 0.40 | Inf | 0.91  | 2.5  | 1555           | 71 | 123 | 1414 | 1696 |
|                           |                                         | Organized | 2.34     | 0.42 | Inf | 1.51  | 3.2  | 1331           | 70 | 114 | 1193 | 1470 |
|                           | English                                 | Mixed     | 1.17     | 0.40 | Inf | 0.37  | 2.0  | 1652           | 87 | 96  | 1480 | 1825 |
|                           |                                         | Organized | 0.76     | 0.40 | Inf | -0.02 | 1.5  | 1710           | 88 | 101 | 1534 | 1885 |
| English                   | German                                  | Mixed     | 1.31     | 0.38 | Inf | 0.57  | 2.1  | 1542           | 69 | 125 | 1405 | 1679 |
|                           |                                         | Organized | 2.28     | 0.40 | Inf | 1.50  | 3.1  | 1411           | 67 | 111 | 1278 | 1544 |
|                           | English                                 | Mixed     | 1.17     | 0.39 | Inf | 0.41  | 1.9  | 1614           | 83 | 99  | 1450 | 1778 |
|                           |                                         | Organized | 0.65     | 0.38 | Inf | -0.10 | 1.4  | 1554           | 84 | 106 | 1387 | 1722 |

*Note.* The Estimated Marginal Means (emmeans) and 95% confidence intervals were obtained using the emmeans function. Accuracy values are provided on the logit scale; no degrees of freedom are available for generalized linear mixed models. ALCL and AUCL refer to asymptotic lower and upper confidence limit, respectively.

## S13: Matching Groups of Experiment 3

Experiment 3 consisted of 38 participants in total: Among them, 19 were multilingual individuals who lived in countries where neither German nor English is prevalent and the other 19 participants constituted the matching group, picked from the sample in Experiment 1 (multilinguals living in Germany or Austria). The selection of these participants from Experiment 1 was based on criteria as having the same native language (or one from a similar language family if an exact match was not available) and similar proficiency in both German and English. Matched participants are in the same row in the table.

| Participants from Non-German / non-English speaking Countries (recruited specifically for Experiment 3) |                       |                        | Matching Person: Participants from German-speaking Countries (from Experiment 1) |                       |                        |
|---------------------------------------------------------------------------------------------------------|-----------------------|------------------------|----------------------------------------------------------------------------------|-----------------------|------------------------|
| Mother Tongue                                                                                           | Proficiency in German | Proficiency in English | Mother Tongue                                                                    | Proficiency in German | Proficiency in English |
| Italian                                                                                                 | C1                    | C2                     | Spanish                                                                          | C1                    | C1                     |
| Dutch                                                                                                   | B2                    | C2                     | Serbo-Croatian                                                                   | B2                    | C2                     |
| Finnish                                                                                                 | C1                    | C1                     | Swedish                                                                          | C2                    | C2                     |
| Spanish                                                                                                 | B2                    | C1                     | Spanish                                                                          | B2                    | C1                     |
| Spanish                                                                                                 | B2                    | B1                     | Spanish                                                                          | B1                    | B1                     |
| French                                                                                                  | C1                    | B2                     | French                                                                           | C2                    | B1                     |
| Dutch                                                                                                   | C2                    | B2                     | Norwegian                                                                        | C2                    | B1                     |
| Portuguese                                                                                              | B2                    | B2                     | Portuguese                                                                       | B2                    | C1                     |
| Italian                                                                                                 | C1                    | B2                     | Portuguese                                                                       | C1                    | B2                     |
| Dutch                                                                                                   | C2                    | B1                     | Georgian                                                                         | C2                    | B1                     |
| Italian                                                                                                 | C2                    | C2                     | Spanish                                                                          | C1                    | C1                     |
| French                                                                                                  | C1                    | B1                     | French                                                                           | C1                    | B2                     |
| Bulgarian                                                                                               | C1                    | C2                     | Bulgarian                                                                        | C1                    | B2                     |
| Hungarian                                                                                               | C2                    | C2                     | Serbian                                                                          | C2                    | C2                     |
| Dutch                                                                                                   | C1                    | B2                     | Armenian                                                                         | C1                    | B2                     |
| Hungarian                                                                                               | C1                    | C1                     | Romanian                                                                         | C1                    | C1                     |
| Spanish                                                                                                 | B1                    | C1                     | Spanish                                                                          | B1                    | B2                     |
| Italian                                                                                                 | C2                    | C2                     | Portuguese                                                                       | C2                    | C1                     |
| Italian                                                                                                 | C2                    | C2                     | Italian,<br>Albanian                                                             | C2                    | C1                     |

## S14. Experiment 3: Overview of participants' language skills

| Participant | L1         | L2      | L3      | Additional Languages                                           | Country of Residence | Language Count |
|-------------|------------|---------|---------|----------------------------------------------------------------|----------------------|----------------|
| 0703        | Italian    | English | German  | Spanish, French                                                | Italy                | 5              |
| 1202        | Dutch      | English | German  | French                                                         | Belgium              | 4              |
| 1210        | Finnish    | English | German  | Swedish                                                        | Finland              | 4              |
| 1323        | Spanish    | English | German  | -                                                              | Mexico               | 3              |
| 1601        | Spanish    | English | German  | -                                                              | Mexico               | 3              |
| 1612        | Italian    | English | German  | French, Russian                                                | Italy                | 5              |
| 1612A       | French     | German  | English | Italian                                                        | France               | 4              |
| 1904        | Dutch      | English | German  | Italian                                                        | Netherlands          | 4              |
| 2141        | Portuguese | English | German  | Spanish, French                                                | Brazil               | 5              |
| 2201        | Italian    | English | German  | -                                                              | Italy                | 3              |
| 2308        | Dutch      | English | German  | -                                                              | Netherlands          | 3              |
| 2344        | Italian    | English | German  | French                                                         | Italy                | 4              |
| 2745        | French     | German  | English | -                                                              | France               | 3              |
| 2910        | Bulgarian  | English | German  | -                                                              | Bulgaria             | 3              |
| 3354        | Hungarian  | German  | English | Norwegian, Icelandic, Swedish, Danish, French, Spanish, Polish | Hungary              | 10             |
| 3770        | Dutch      | English | German  | French                                                         | Netherlands          | 4              |
| 4281        | Hungarian  | German  | English | Japanese, Chinese, Spanish                                     | Hungary              | 6              |
| 7312        | Spanish    | English | German  | -                                                              | Mexico               | 3              |
| 9705        | Italian    | English | German  | French, Russian, Swedish                                       | Italy                | 6              |

|       |                |         |         |                                          |         |   |
|-------|----------------|---------|---------|------------------------------------------|---------|---|
| 210   | French         | English | German  | -                                        | Germany | 3 |
| 1000  | Serbo-Croatian | English | German  | Serbian, Russian, Italian                | Germany | 6 |
| 1215  | French         | German  | English | -                                        | Germany | 3 |
| 1366  | Spanish        | English | German  | French                                   | Germany | 4 |
| 1407  | Portuguese     | English | German  | Spanish                                  | Germany | 4 |
| 1503  | Portuguese     | English | German  | Spanish, French                          | Germany | 5 |
| 1802  | Georgian       | German  | English | Russian                                  | Germany | 4 |
| 1929  | Serbian        | German  | English | Macedonian, Bulgarian, Croatian, Chinese | Germany | 7 |
| 1998  | Armenian       | English | German  | Russian, Italian                         | Germany | 5 |
| 2007  | Swedish        | English | German  | Italian, French, English                 | Germany | 6 |
| 2369  | Bulgarian      | English | German  | -                                        | Germany | 3 |
| 2615  | Norwegian      | English | German  | -                                        | Germany | 3 |
| 3101  | Spanish        | English | German  | -                                        | Germany | 3 |
| 4790  | Romanian       | English | German  | Russian, French, Spanish                 | Germany | 6 |
| 5416  | Spanish        | English | German  | -                                        | Germany | 3 |
| 6464  | Italian        | English | German  | Albanian, Russian, Spanish               | Germany | 6 |
| 8791  | Portuguese     | English | German  | -                                        | Germany | 3 |
| 9266  | Spanish        | English | German  | -                                        | Germany | 3 |
| 15673 | Spanish        | English | German  | Italian                                  | Germany | 4 |

---

*Note:* While English and German appear here as L2 and L3 (or vice versa) for all participants in the sequentially correct order of acquisition, we did not ask AoA for all other languages. Thus, one or more of the “Additional Languages” may in fact have been acquired before English and/or German. Participants residing in the German-language context came from Experiment 1 (see Supplemental Table S1, above).

## S15. Experiment 3, Language variables: Means, standard deviations, and Pearson's correlations.

(a) Total sample ( $N = 38$ )

| Variable                | M     | SD    | 1      | 2      | 3     | 4      | 5     | 6     | 7     | 8     | 9    | 10    | 11   | 12    | 13     | 14   | 15     | 16     | 17   | 18   |
|-------------------------|-------|-------|--------|--------|-------|--------|-------|-------|-------|-------|------|-------|------|-------|--------|------|--------|--------|------|------|
| 1. Age                  | 32.37 | 10.84 |        |        |       |        |       |       |       |       |      |       |      |       |        |      |        |        |      |      |
| 2. Proficiency G        | 5.00  | 0.93  | -.08   |        |       |        |       |       |       |       |      |       |      |       |        |      |        |        |      |      |
| 3. Proficiency E        | 4.63  | 1.08  | -.17   | .11    |       |        |       |       |       |       |      |       |      |       |        |      |        |        |      |      |
| 4. Production G         | 5.37  | 1.20  | .32    | .32    | -.25  |        |       |       |       |       |      |       |      |       |        |      |        |        |      |      |
| 5. Production E         | 4.87  | 1.34  | -.02   | -.28   | .62** | -.14   |       |       |       |       |      |       |      |       |        |      |        |        |      |      |
| 6. Reception G          | 5.74  | 0.76  | .24    | .34*   | -.09  | .68**  | -.11  |       |       |       |      |       |      |       |        |      |        |        |      |      |
| 7. Reception E          | 5.37  | 1.26  | -.29   | -.25   | .66** | -.18   | .80** | -.15  |       |       |      |       |      |       |        |      |        |        |      |      |
| 8. AoA G                | 16.29 | 7.96  | .56**  | -.57** | -.08  | .14    | .25   | -.02  | .06   |       |      |       |      |       |        |      |        |        |      |      |
| 9. AoA E                | 9.42  | 3.76  | .38*   | .28    | -.24  | .43**  | -.00  | .53** | -.21  | .07   |      |       |      |       |        |      |        |        |      |      |
| 10. Work G              | 0.58  | 0.50  | .34*   | .46**  | -.15  | .63**  | -.33* | .48** | -.39* | -.06  | .21  |       |      |       |        |      |        |        |      |      |
| 11. Work E              | 0.26  | 0.45  | -.02   | -.26   | .26   | -.34*  | .42** | -.19  | .26   | .07   | -.12 | -.34* |      |       |        |      |        |        |      |      |
| 12. Work M              | 0.47  | 0.51  | .03    | .00    | .03   | -.07   | -.18  | -.02  | -.11  | .01   | -.05 | -.15  | -.21 |       |        |      |        |        |      |      |
| 13. Daily Life G        | 0.39  | 0.50  | .51**  | .29    | -.28  | .57**  | -.20  | .43** | -.33* | .09   | .27  | .58** | -.24 | -.33* |        |      |        |        |      |      |
| 14. Daily Life E        | 0.11  | 0.31  | .22    | -.47** | .12   | .04    | .29   | .01   | .17   | .57** | .15  | -.23  | .38* | .02   | -.28   |      |        |        |      |      |
| 15. Daily Life M        | 0.58  | 0.50  | -.53** | -.06   | .21   | -.46** | .08   | -.37* | .17   | -.31  | -.16 | -.40* | .03  | .38*  | -.73** | -.23 |        |        |      |      |
| 16. Thoughts G          | 0.27  | 0.45  | .38*   | .38*   | -.20  | .43**  | -.41* | .30   | -.41* | -.08  | .34* | .50** | -.23 | -.07  | .74**  | -.21 | -.45** |        |      |      |
| 17. Thoughts E          | 0.05  | 0.23  | -.21   | -.01   | .19   | -.07   | .11   | -.07  | .03   | -.07  | -.00 | -.05  | .12  | -.22  | .05    | -.08 | .21    | .12    |      |      |
| 18. Thoughts M          | 0.81  | 0.40  | -.23   | -.29   | .23   | -.32   | .32   | -.17  | .41*  | .11   | -.29 | -.40* | .14  | .03   | -.58** | .17  | .27    | -.79** | -.19 |      |
| 19. Number of Languages | 4.26  | 1.46  | -.08   | .38*   | .54** | .02    | .36*  | .11   | .36*  | -.28  | .19  | .08   | .22  | .01   | -.04   | -.06 | .08    | .02    | .21  | -.01 |

Note. G, E and M indicate German, English and Mother Tongue, respectively. Proficiency was measured on a 6-point scale with higher values for higher proficiency. Productive and receptive use of German and English were assessed on 7-point scales with higher values reflecting more frequent use. The remaining variables were coded with 1 if it applied to the participant, and with 0 if it did not. \*  $p < .05$ . \*\*  $p < .01$ .



## (b) Non-German context (N = 19)

*Means, standard deviations, and Pearson's correlations of language variables of the sample living in non-German / non-English speaking countries.*

| Variable                | M     | SD   | 1      | 2      | 3     | 4     | 5     | 6    | 7    | 8     | 9    | 10   | 11    | 12   | 13     | 14 | 15     | 16     | 17  | 18  |
|-------------------------|-------|------|--------|--------|-------|-------|-------|------|------|-------|------|------|-------|------|--------|----|--------|--------|-----|-----|
| 1. Age                  | 26.95 | 6.42 |        |        |       |       |       |      |      |       |      |      |       |      |        |    |        |        |     |     |
| 2. Proficiency G        | 5.00  | 0.88 | -.01   |        |       |       |       |      |      |       |      |      |       |      |        |    |        |        |     |     |
| 3. Proficiency E        | 4.79  | 1.13 | -.31   | .17    |       |       |       |      |      |       |      |      |       |      |        |    |        |        |     |     |
| 4. Production G         | 4.68  | 1.16 | -.01   | .22    | -.27  |       |       |      |      |       |      |      |       |      |        |    |        |        |     |     |
| 5. Production E         | 4.95  | 1.35 | -.09   | -.19   | .68** | -.26  |       |      |      |       |      |      |       |      |        |    |        |        |     |     |
| 6. Reception G          | 5.37  | 0.76 | .12    | .17    | .03   | .39   | -.14  |      |      |       |      |      |       |      |        |    |        |        |     |     |
| 7. Reception E          | 5.58  | 1.43 | -.32   | -.22   | .70** | -.15  | .77** | -.11 |      |       |      |      |       |      |        |    |        |        |     |     |
| 8. AoA G                | 12.53 | 3.96 | -.27   | -.64** | -.18  | -.13  | .09   | -.14 | .09  |       |      |      |       |      |        |    |        |        |     |     |
| 9. AoA E                | 8.26  | 3.19 | .56*   | .34    | -.31  | .05   | -.10  | .46* | -.33 | -.33  |      |      |       |      |        |    |        |        |     |     |
| 10. Work G              | 0.37  | 0.50 | .25    | .51*   | -.15  | .70** | -.22  | .36  | -.32 | -.33  | .39  |      |       |      |        |    |        |        |     |     |
| 11. Work E              | 0.26  | 0.45 | .25    | .00    | .44   | -.36  | .57*  | -.14 | .27  | -.11  | .10  | -.21 |       |      |        |    |        |        |     |     |
| 12. Work M              | 0.63  | 0.50 | -.32   | -.13   | -.05  | .17   | -.28  | .23  | .00  | .16   | -.04 | -.10 | -.53* |      |        |    |        |        |     |     |
| 13. Daily Life G        | 0.05  | 0.23 | .68**  | .00    | -.38  | .28   | -.17  | -.12 | -.27 | -.34  | .13  | .31  | -.14  | -.31 |        |    |        |        |     |     |
| 14. Daily Life E        | 0.00  | 0.00 | NA     | NA     | NA    | NA    | NA    | NA   | NA   | NA    | NA   | NA   | NA    | NA   | NA     |    |        |        |     |     |
| 15. Daily Life M        | 0.95  | 0.23 | -.68** | .00    | .38   | -.28  | .17   | .12  | .27  | .34   | -.13 | -.31 | .14   | .31  | -1.0** | NA |        |        |     |     |
| 16. Thoughts G          | 0.06  | 0.24 | .68**  | -.02   | -.40  | .30   | -.18  | -.11 | -.27 | -.33  | .12  | .30  | -.15  | -.30 | 1.0**  | NA | -1.0** |        |     |     |
| 17. Thoughts E          | 0.06  | 0.24 | -.04   | -.02   | .25   | -.13  | .18   | -.11 | .08  | .10   | -.18 | -.19 | .39   | -.30 | -.06   | NA | .06    | -.06   |     |     |
| 18. Thoughts M          | 0.94  | 0.24 | -.68** | .02    | .40   | -.30  | .18   | .11  | .27  | .33   | -.12 | -.30 | .15   | .30  | -1.0** | NA | 1.0**  | -1.0** | .06 |     |
| 19. Number of Languages | 4.37  | 1.71 | .19    | .41    | .44   | .06   | .35   | .19  | .32  | -.49* | .36  | .16  | .44   | .04  | -.19   | NA | .19    | -.19   | .10 | .19 |

*Note.* G, E and M indicate German, English and Mother Tongue, respectively. Proficiency was measured on a 6-point scale with higher values for higher proficiency. Productive and receptive use of German and English were assessed on 7-point scales with higher values reflecting more frequent use. The remaining variables were coded with 1 if it applied to the participant, and with 0 if it did not. For English usage in daily life, NA is assigned as the SD of the variable was zero (no variation). \*  $p < .05$ . \*\*  $p < .01$ .

## (c) German context (N = 19)

*Means, standard deviations, and Pearson's correlations of language variables of the sample living in German speaking countries.*

| Variable                | M     | SD    | 1     | 2      | 3     | 4     | 5     | 6     | 7     | 8    | 9    | 10     | 11    | 12   | 13     | 14    | 15   | 16     | 17   | 18   |
|-------------------------|-------|-------|-------|--------|-------|-------|-------|-------|-------|------|------|--------|-------|------|--------|-------|------|--------|------|------|
| 1. Age                  | 37.79 | 11.75 |       |        |       |       |       |       |       |      |      |        |       |      |        |       |      |        |      |      |
| 2. Proficiency G        | 5.00  | 1.00  | -.14  |        |       |       |       |       |       |      |      |        |       |      |        |       |      |        |      |      |
| 3. Proficiency E        | 4.47  | 1.02  | .00   | .05    |       |       |       |       |       |      |      |        |       |      |        |       |      |        |      |      |
| 4. Production G         | 6.05  | 0.78  | .07   | .64**  | -.10  |       |       |       |       |      |      |        |       |      |        |       |      |        |      |      |
| 5. Production E         | 4.79  | 1.36  | .07   | -.37   | .56*  | .06   |       |       |       |      |      |        |       |      |        |       |      |        |      |      |
| 6. Reception G          | 6.11  | 0.57  | -.10  | .69**  | -.09  | .87** | -.04  |       |       |      |      |        |       |      |        |       |      |        |      |      |
| 7. Reception E          | 5.16  | 1.07  | -.22  | -.31   | .59** | -.01  | .87** | -.03  |       |      |      |        |       |      |        |       |      |        |      |      |
| 8. AoA G                | 20.05 | 9.20  | .58** | -.69** | .07   | -.30  | .45   | -.52* | .24   |      |      |        |       |      |        |       |      |        |      |      |
| 9. AoA E                | 10.58 | 4.00  | .16   | .26    | -.13  | .68** | .11   | .49*  | -.01  | -.02 |      |        |       |      |        |       |      |        |      |      |
| 10. Work G              | 0.79  | 0.42  | .11   | .53*   | -.01  | .21   | -.47* | .33   | -.42  | -.39 | -.19 |        |       |      |        |       |      |        |      |      |
| 11. Work E              | 0.26  | 0.45  | -.18  | -.49*  | .08   | -.51* | .28   | -.33  | .25   | .17  | -.30 | -.57*  |       |      |        |       |      |        |      |      |
| 12. Work M              | 0.32  | 0.48  | .56*  | .12    | .02   | .10   | -.15  | .08   | -.43  | .24  | .13  | .07    | .11   |      |        |       |      |        |      |      |
| 13. Daily Life G        | 0.74  | 0.45  | .12   | .61**  | -.20  | .36   | -.28  | .33   | -.37  | -.40 | .06  | .57*   | -.46* | -.11 |        |       |      |        |      |      |
| 14. Daily Life E        | 0.21  | 0.42  | .07   | -.66** | .27   | -.38  | .47*  | -.33  | .42   | .53* | .06  | -.68** | .57*  | .20  | -.86** |       |      |        |      |      |
| 15. Daily Life M        | 0.21  | 0.42  | -.15  | -.13   | .01   | .13   | -.02  | -.10  | -.08  | .01  | .22  | -.05   | -.02  | .20  | -.28   | .05   |      |        |      |      |
| 16. Thoughts G          | 0.47  | 0.51  | .07   | .65**  | -.03  | .21   | -.57* | .20   | -.55* | -.42 | .29  | .49*   | -.33  | .26  | .57*   | -.49* | .03  |        |      |      |
| 17. Thoughts E          | 0.05  | 0.23  | -.37  | .00    | .12   | -.02  | .04   | -.04  | -.04  | -.16 | .15  | .12    | -.14  | -.16 | .14    | -.12  | .46* | .25    |      |      |
| 18. Thoughts M          | 0.68  | 0.48  | .09   | -.47*  | .10   | -.10  | .41   | -.08  | .54*  | .33  | -.25 | -.35   | .15   | -.27 | -.41   | .35   | -.20 | -.72** | -.35 |      |
| 19. Number of Languages | 4.16  | 1.21  | -.24  | .37    | .70** | .11   | .39   | .14   | .41   | -.22 | .08  | .07    | -.08  | -.09 | .18    | -.07  | -.07 | .23    | .37  | -.20 |

*Note.* G, E and M indicate German, English and Mother Tongue, respectively. Proficiency was measured on a 6-point scale with higher values for higher proficiency. Productive and receptive use of German and English were assessed on 7-point scales with higher values reflecting more frequent use. The remaining variables were coded with 1 if it applied to the participant, and with 0 if it did not. \*  $p < .05$ . \*\*  $p < .01$ .

## S16. Experiment 3: Estimated marginal means and respective Confidence Intervals for Language Context, Response Language and List Type.

(a) Translation

| Context Language<br>(Environment) | Response Language<br>(Translating into) | List Type | Accuracy |      |     |       |      | Response Times |    |     |      |      |
|-----------------------------------|-----------------------------------------|-----------|----------|------|-----|-------|------|----------------|----|-----|------|------|
|                                   |                                         |           | emmean   | SE   | df  | ALCL  | AUCL | emmean         | SE | df  | LCL  | UCL  |
| German                            | German                                  | Mixed     | 1.79     | 0.38 | Inf | 1.04  | 2.53 | 1591           | 89 | 131 | 1415 | 1766 |
|                                   |                                         | Organized | 1.85     | 0.38 | Inf | 1.10  | 2.60 | 1503           | 89 | 132 | 1326 | 1679 |
|                                   |                                         | Abstract  | 1.64     | 0.37 | Inf | 0.91  | 2.37 | 1486           | 89 | 131 | 1310 | 1662 |
|                                   | English                                 | Mixed     | 1.57     | 0.38 | Inf | 0.82  | 2.31 | 1600           | 89 | 131 | 1425 | 1775 |
|                                   |                                         | Organized | 0.16     | 0.37 | Inf | -0.56 | 0.88 | 1799           | 94 | 161 | 1613 | 1985 |
|                                   |                                         | Abstract  | 1.21     | 0.38 | Inf | 0.47  | 1.95 | 1636           | 90 | 136 | 1459 | 1813 |
|                                   | German                                  | Mixed     | 0.70     | 0.36 | Inf | -0.01 | 1.41 | 1659           | 92 | 150 | 1476 | 1841 |
|                                   |                                         | Organized | 1.15     | 0.37 | Inf | 0.43  | 1.87 | 1532           | 91 | 140 | 1353 | 1711 |
|                                   |                                         | Abstract  | 0.50     | 0.36 | Inf | -0.20 | 1.20 | 1615           | 92 | 151 | 1433 | 1797 |
| Non-German /<br>non-English       | English                                 | Mixed     | 1.06     | 0.37 | Inf | 0.33  | 1.79 | 1691           | 90 | 139 | 1513 | 1868 |
|                                   |                                         | Organized | 0.37     | 0.37 | Inf | -0.35 | 1.09 | 1818           | 93 | 153 | 1635 | 2001 |
|                                   |                                         | Abstract  | 1.00     | 0.37 | Inf | 0.27  | 1.73 | 1725           | 90 | 139 | 1547 | 1903 |

*Note.* The Estimated Marginal Means (emmeans) and 95% confidence intervals were obtained using the emmeans function. Accuracy values are provided on the logit scale; no degrees of freedom are available for generalized linear mixed models, for RT Kenward-Roger degrees of freedom were used. ALCL and AUCL refer to asymptotic lower and upper confidence limit, respectively.

(b) Picture Naming

*Experiment 3, Picture Naming Tasks: Estimated marginal means and respective Confidence Intervals for Language Context, Response Language and List Type.*

| Context Language<br>(Environment) | Response Language<br>(Translating into) | List Type | Accuracy |      |     |       |      | Response Times |    |     |      |      |
|-----------------------------------|-----------------------------------------|-----------|----------|------|-----|-------|------|----------------|----|-----|------|------|
|                                   |                                         |           | emmean   | SE   | df  | ALCL  | AUCL | emmean         | SE | df  | LCL  | UCL  |
| German                            | German                                  | Mixed     | 2.38     | 0.37 | Inf | 1.66  | 3.1  | 1451           | 83 | 96  | 1286 | 1615 |
|                                   |                                         | Organized | 3.20     | 0.43 | Inf | 2.36  | 4.0  | 1267           | 82 | 94  | 1104 | 1431 |
|                                   | English                                 | Mixed     | 1.78     | 0.38 | Inf | 1.03  | 2.5  | 1407           | 89 | 92  | 1230 | 1584 |
|                                   |                                         | Organized | 1.64     | 0.38 | Inf | 0.90  | 2.4  | 1530           | 89 | 94  | 1353 | 1708 |
| Non-German /<br>non-English       | German                                  | Mixed     | 0.45     | 0.31 | Inf | -0.16 | 1.1  | 1722           | 88 | 120 | 1548 | 1896 |
|                                   |                                         | Organized | 1.45     | 0.34 | Inf | 0.80  | 2.1  | 1479           | 85 | 104 | 1311 | 1647 |
|                                   | English                                 | Mixed     | 1.46     | 0.37 | Inf | 0.73  | 2.2  | 1506           | 90 | 94  | 1328 | 1683 |
|                                   |                                         | Organized | 1.24     | 0.37 | Inf | 0.52  | 2.0  | 1577           | 90 | 96  | 1398 | 1755 |

*Note.* The Estimated Marginal Means (emmeans) and 95% confidence intervals were obtained using the emmeans function. Accuracy values are provided on the logit scale; no degrees of freedom are available for generalized linear mixed models. ALCL and AUCL refer to asymptotic lower and upper confidence limit, respectively.
